## CORRECTION

# Bok is a genuine multi-BH-domain protein that triggers apoptosis in the absence of Bax and Bak

**Stephanie Einsele-Scholz, Silke Malmshaimer, Katrin Bertram, Daniel Stehle, Janina Johanning, Marianne Manz, Peter T. Daniel, Bernhard F. Gillissen, Klaus Schulze-Osthoff and Frank Essmann**

There was an error published in *J. Cell Sci.* **129**, 2213–2223.

In Fig. 4A, a statement that duplicate  $\alpha$ -tubulin blots are shown for Mcl-1 and Bok, and for caspase-3 and Bax, because the same membranes were probed for these proteins, was inadvertently omitted from the legend.

The authors apologise to the readers for any confusion that this error might have caused.
